# Supplementary material for: Comparison of immunogenicity and safety outcomes of a malaria vaccine FMP013/ALFQ in rhesus macaques (Macaca mulatta) of Indian and Chinese origin
Source: Springer Nature journal article supplement (doi:10.1186/s12936-019-3014-5), 2019-11-27
Supplement: MOESM1 [file 17440218]

| InR    |        |        |             |           | ChR    |         |        |             |           |
|--------|--------|--------|-------------|-----------|--------|---------|--------|-------------|-----------|
| ID     | Strain | Sex    | Weight (kg) | Birthdate | ID     | Strain  | Sex    | Weight (kg) | Birthdate |
| 11C073 | Indian | Male   | 10.38       | 29-Apr-11 | 142543 | Chinese | Female | 5.56        | 19-Feb-11 |
| 09U011 | Indian | Female | 8.1         | 23-Feb-09 | 142565 | Chinese | Female | 5.32        | 26-Mar-10 |
| 11D203 | Indian | Male   | 6.54        | 19-Dec-11 | 66164  | Chinese | Female | 4.06        | 20-Feb-06 |
| 10D213 | Indian | Female | 6.04        | 17-Aug-10 | RA0454 | Chinese | Female | 6.42        | 25-Apr-11 |
| 10C160 | Indian | Male   | 10.76       | 11-Aug-10 | 142569 | Chinese | Female | 5.42        | 5-Feb-10  |
| 10U004 | Indian | Female | 5.44        | 12-Mar-10 | RA0464 | Chinese | Female | 6.38        | 28-Apr-11 |

**Additional file 1: Table S1**

**InR**

|                  | Reference<br>Range | Baseline | Vaccine 1 |           |           | Vaccine 2 |           |           | Vaccine 3 |           |           |
|------------------|--------------------|----------|-----------|-----------|-----------|-----------|-----------|-----------|-----------|-----------|-----------|
|                  |                    |          | 2/21/2018 | 2/23/2018 | 2/27/2018 | 3/20/2018 | 3/22/2018 | 3/26/2018 | 4/17/2018 | 4/19/2018 | 4/23/2018 |
|                  |                    |          | Day 1     | Day 3     | Day 7     | Day 1     | Day 3     | Day 7     | Day 1     | Day 3     | Day 7     |
| <b>CBC</b>       |                    |          |           |           |           |           |           |           |           |           |           |
| WBC (2.9 - 13.2) | 4.00 - 13.00       | 6.31     | 15.10     | 7.45      | 7.76      | 13.24     | 7.51      | 6.70      | 12.22     | 6.65      | 7.81      |
| RBC (4.1 - 7.8)  | 4.30 - 6.20        | 5.37     | 5.24      | 4.97      | 4.92      | 5.08      | 4.73      | 5.13      | 5.14      | 5.00      | 4.88      |
| HGB              | 10.6 - 14.2        | 12.68    | 12.43     | 11.72     | 11.60     | 11.92     | 11.08     | 11.88     | 11.97     | 11.65     | 11.47     |
| HCT              | 36.6 - 43.8        | 40.15    | 39.42     | 37.72     | 37.43     | 38.63     | 35.67     | 38.95     | 38.23     | 37.63     | 36.62     |
| MCV              | 65.6 - 76.9        | 74.85    | 75.17     | 75.95     | 76.17     | 76.13     | 75.32     | 75.92     | 74.45     | 75.33     | 75.12     |
| MCH              | 20.6 - 24.6        | 23.65    | 23.72     | 23.57     | 23.58     | 23.48     | 23.40     | 23.12     | 23.30     | 23.30     | 23.60     |
| MCHC             | 30.6 - 32.8        | 31.60    | 31.52     | 31.03     | 30.95     | 30.83     | 31.03     | 30.43     | 31.25     | 30.95     | 31.40     |
| PLT              | 97 - 436           | 348.83   | 366.67    | 336.17    | 432.83    | 357.17    | 351.00    | 500.83    | 341.17    | 327.17    | 430.00    |
| MPV              | 9.2 - 12.4         | 11.18    | 11.25     | 11.32     | 10.92     | 11.25     | 11.37     | 10.80     | 11.33     | 11.50     | 11.18     |
| #NEUT            | 1.25 - 9.20        | 2.64     | 12.18     | 4.03      | 4.04      | 10.58     | 4.64      | 2.72      | 10.20     | 3.40      | 3.59      |
| #LYMPH           | 0.80 - 3.71        | 3.09     | 1.95      | 2.71      | 3.03      | 1.89      | 2.41      | 3.48      | 1.43      | 2.63      | 4.02      |
| #MONO            | 0.13 - 0.63        | 0.45     | 0.90      | 0.61      | 0.56      | 0.65      | 0.64      | 0.47      | 0.54      | 0.56      | 0.54      |
| #EOS             | 0.00 - 0.18        | 0.13     | 0.07      | 0.08      | 0.10      | 0.11      | 0.08      | 0.03      | 0.04      | 0.06      | 0.02      |
| #BASO            | 0.00 - 0.01        | 0.01     | 0.02      | 0.02      | 0.02      | 0.01      | 0.01      | 0.01      | 0.01      | 0.01      | 0.01      |
| <b>Chemistry</b> |                    |          |           |           |           |           |           |           |           |           |           |
| BUN              | 11 - 27            | 14.67    | 14.00     | 14.33     | 14.33     | 12.67     | 12.17     | 14.17     | 13.17     | 12.17     | 14.83     |
| Creatinine       | .3 - 1.4           | 0.88     | 0.90      | 0.90      | 0.87      | 0.92      | 0.90      | 0.85      | 0.87      | 0.88      | 0.80      |
| Total Protein    | 5.8 - 7.4          | 6.78     | 6.78      | 6.68      | 6.70      | 6.65      | 6.47      | 6.93      | 6.57      | 6.62      | 6.82      |
| AST              | 29 - 64            | 61.33    | 53.33     | 49.67     | 40.33     | 64.17     | 37.17     | 28.83     | 63.33     | 40.83     | 28.33     |
| ALT              | 19 - 91            | 61.33    | 41.83     | 54.33     | 54.83     | 51.67     | 50.33     | 41.17     | 55.50     | 55.00     | 41.50     |
| LDH              | 639 - 2903         | 1213.17  | 1229.33   | 978.67    | 1077.83   | 1080.17   | 675.67    | 633.00    | 1045.00   | 811.00    | 599.67    |
| CK               | 69 - 972           | 421.00   | 1032.33   | 545.00    | 696.17    | 1721.83   | 555.50    | 398.33    | 1574.17   | 422.00    | 260.67    |
| ALKP             | 65 - 400           | 122.83   | 131.00    | 129.17    | 115.33    | 132.67    | 133.00    | 124.17    | 118.50    | 114.83    | 106.50    |
| Total Bili       | .1 - .4            | 0.10     | 0.25      | 0.17      | 0.23      | 0.20      | 0.18      | 0.18      | 0.15      | 0.15      | 0.13      |

**Additional file 1: Table S2A**

## ChR

|                  | Reference Range | Baseline | Vaccine 1 |           |           | Vaccine 2 |           |           | Vaccine 3 |           |           |
|------------------|-----------------|----------|-----------|-----------|-----------|-----------|-----------|-----------|-----------|-----------|-----------|
|                  |                 |          | 2/21/2018 | 2/23/2018 | 2/27/2018 | 3/20/2018 | 3/22/2018 | 3/26/2018 | 4/17/2018 | 4/19/2018 | 4/23/2018 |
|                  |                 |          | Day 1     | Day 3     | Day 7     | Day 1     | Day 3     | Day 7     | Day 1     | Day 3     | Day 7     |
| <b>CBC</b>       |                 |          |           |           |           |           |           |           |           |           |           |
| WBC (2.9 - 13.2) | 4.00 - 13.00    | 9.54     | 16.41     | 8.78      | 7.92      | 13.29     | 6.72      | 5.75      | 11.46     | 6.05      | 8.52      |
| RBC (4.1 - 7.8)  | 4.30 - 6.20     | 4.89     | 4.89      | 4.58      | 4.60      | 4.71      | 4.43      | 4.69      | 4.85      | 4.56      | 4.81      |
| HGB              | 10.6 - 14.2     | 11.80    | 11.82     | 11.07     | 11.05     | 11.25     | 10.52     | 11.05     | 11.50     | 10.80     | 11.30     |
| HCT              | 36.6 - 43.8     | 36.92    | 37.35     | 35.48     | 35.53     | 36.48     | 34.57     | 35.85     | 36.45     | 34.78     | 36.37     |
| MCV              | 65.6 - 76.9     | 75.62    | 76.55     | 77.60     | 77.35     | 77.75     | 78.08     | 76.58     | 75.38     | 76.45     | 75.88     |
| MCH              | 20.6 - 24.6     | 24.17    | 24.20     | 24.17     | 24.02     | 23.95     | 23.75     | 23.62     | 23.73     | 23.68     | 23.55     |
| MCHC             | 30.6 - 32.8     | 31.95    | 31.65     | 31.20     | 31.12     | 30.80     | 30.45     | 30.83     | 31.53     | 31.05     | 31.05     |
| PLT              | 97 - 436        | 357.17   | 357.50    | 329.67    | 415.00    | 357.17    | 369.00    | 532.83    | 386.83    | 375.00    | 451.67    |
| MPV              | 9.2 - 12.4      | 10.72    | 10.87     | 11.10     | 10.75     | 10.87     | 10.97     | 10.40     | 10.65     | 10.97     | 10.80     |
| #NEUT            | 1.25 - 9.20     | 6.65     | 13.40     | 4.90      | 4.56      | 11.10     | 3.47      | 2.36      | 9.57      | 3.04      | 4.98      |
| #LYMPH           | 0.80 - 3.71     | 2.44     | 1.90      | 3.01      | 2.83      | 1.44      | 2.58      | 2.82      | 1.29      | 2.40      | 2.93      |
| #MONO            | 0.13 - 0.63     | 0.36     | 1.01      | 0.72      | 0.38      | 0.65      | 0.48      | 0.37      | 0.52      | 0.45      | 0.45      |
| #EOS             | 0.00 - 0.18     | 0.08     | 0.08      | 0.14      | 0.12      | 0.10      | 0.19      | 0.20      | 0.07      | 0.15      | 0.16      |
| #BASO            | 0.00 - 0.01     | 0.02     | 0.02      | 0.02      | 0.03      | 0.01      | 0.01      | 0.01      | 0.01      | 0.01      | 0.01      |
| <b>Chemistry</b> |                 |          |           |           |           |           |           |           |           |           |           |
| BUN              | 11 - 27         | 13.83    | 13.33     | 14.33     | 13.50     | 11.33     | 12.33     | 13.33     | 10.33     | 13.50     | 14.50     |
| Creatinine       | .3 - 1.4        | 13.83    | 0.75      | 0.72      | 0.75      | 0.75      | 0.68      | 0.73      | 0.67      | 0.62      | 0.62      |
| Total Protein    | 5.8 - 7.4       | 6.95     | 7.42      | 7.07      | 7.19      | 7.23      | 6.70      | 7.43      | 6.87      | 6.77      | 7.22      |
| AST              | 29 - 64         | 34.17    | 78.67     | 58.50     | 47.67     | 48.33     | 30.83     | 30.17     | 47.50     | 41.83     | 30.50     |
| ALT              | 19 - 91         | 49.00    | 57.83     | 86.50     | 85.83     | 36.50     | 40.50     | 44.83     | 45.67     | 50.50     | 48.17     |
| LDH              | 639 - 2903      | 525.67   | 838.17    | 646.00    | 559.83    | 750.83    | 502.67    | 513.67    | 702.50    | 751.17    | 559.67    |
| CK               | 69 - 972        | 235.83   | 1099.67   | 273.33    | 308.67    | 766.00    | 304.83    | 326.17    | 701.67    | 391.33    | 272.17    |
| ALKP             | 65 - 400        | 123.17   | 144.83    | 153.00    | 141.33    | 158.00    | 151.17    | 136.33    | 152.83    | 136.17    | 144.50    |
| Total Bili       | .1 - .4         | 0.22     | 0.28      | 0.17      | 0.12      | 0.22      | 0.15      | 0.15      | 0.18      | 0.18      | 0.18      |

**Additional file 1: Table S2B**
